# Supplementary material for: Association of CD206 Protein Expression with Immune Infiltration and Prognosis in Patients with Triple-Negative Breast Cancer
Source: MDPI journal article supplement (doi:10.3390/cancers14194829), 2022-10-03
Supplement: s1 [file s1]

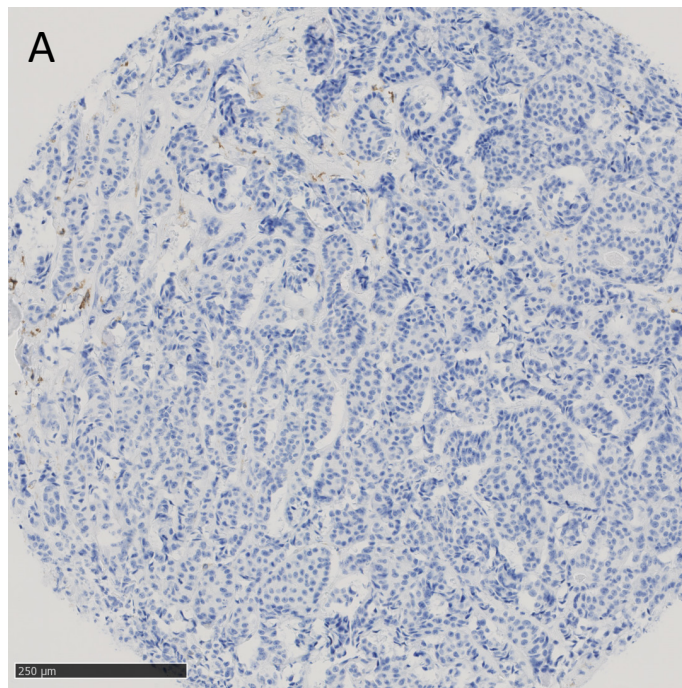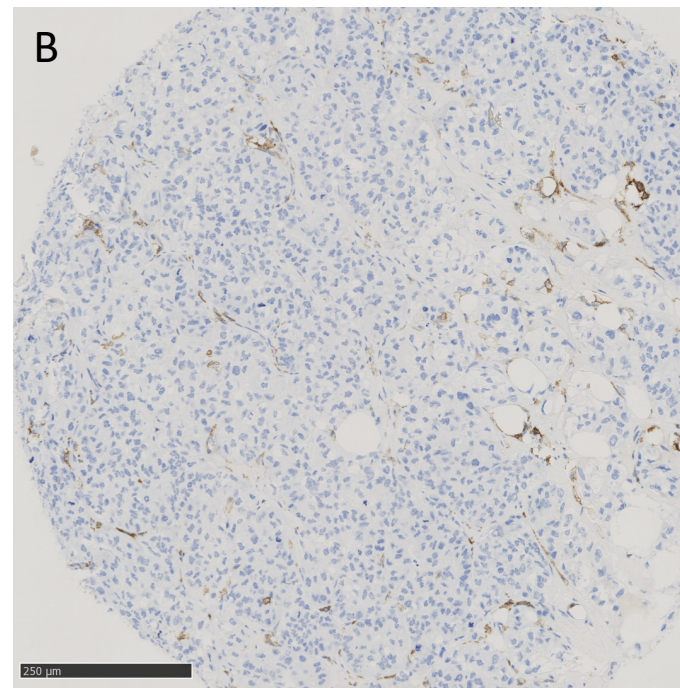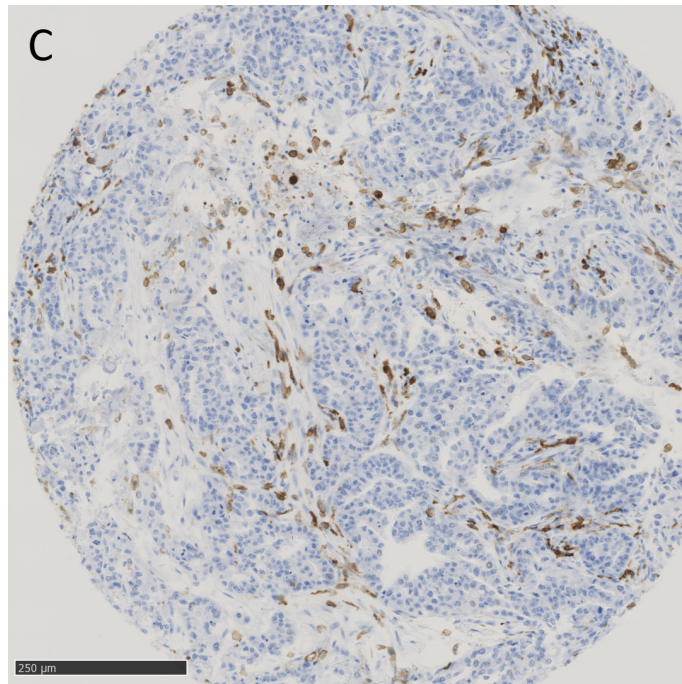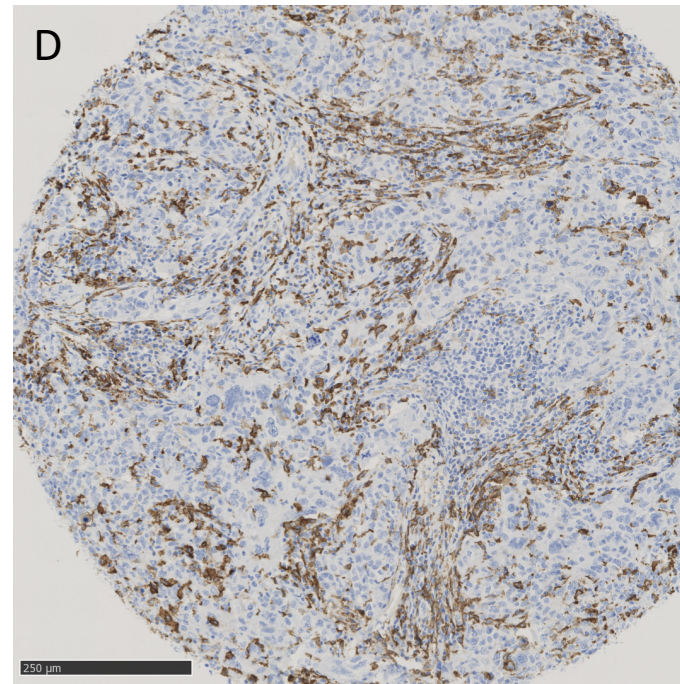

**Supplementary figure S4:** Quantification of CD163 expression by IHC. CD163<sup>+</sup> macrophage infiltration was quantified as: absent/very low (score 0; A), weak (score 1; B), moderate (score 2; C), or strong (score 3; D). Scale bar: 250  $\mu$ m
