# Supplementary material for: Association of CD206 Protein Expression with Immune Infiltration and Prognosis in Patients with Triple-Negative Breast Cancer
Source: MDPI journal article supplement (doi:10.3390/cancers14194829), 2022-10-03
Supplement: s1 [file s1]

A) CD68

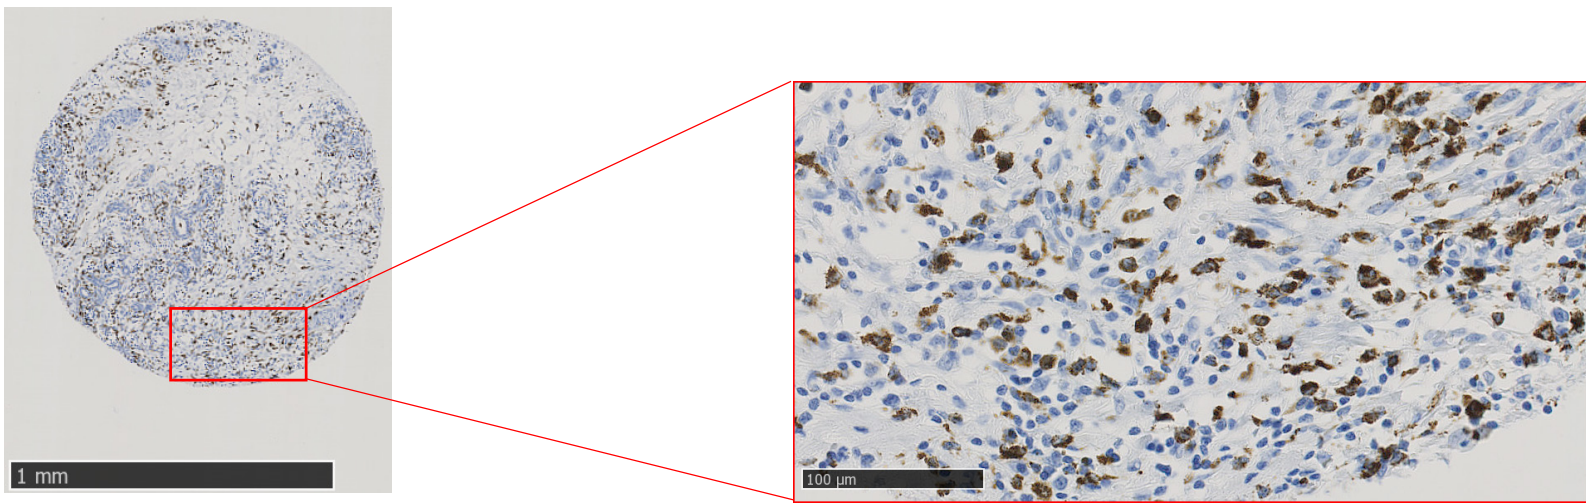

B) CD163

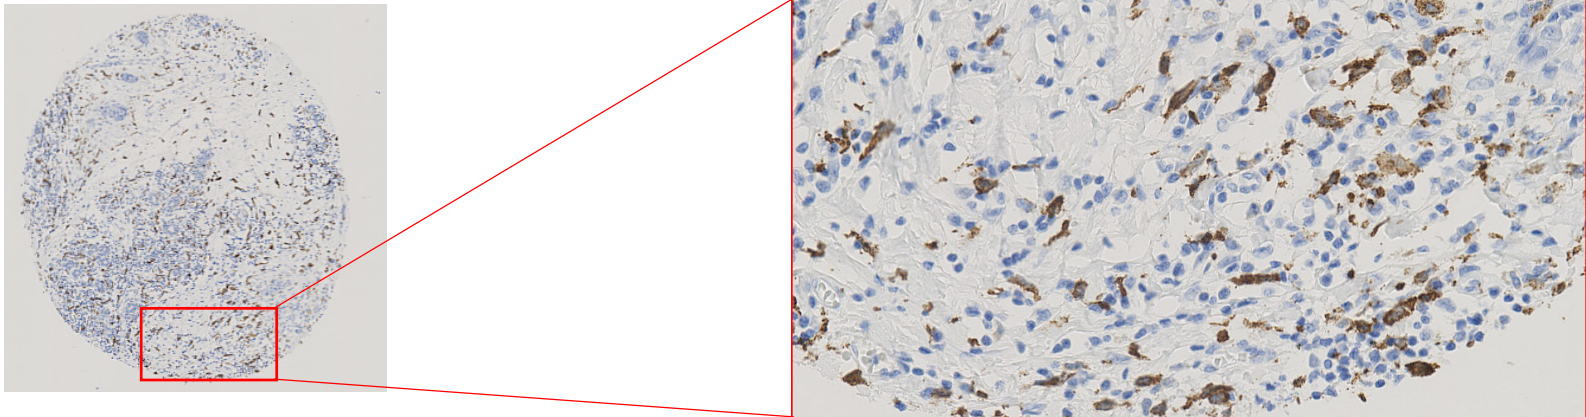

C) CD206

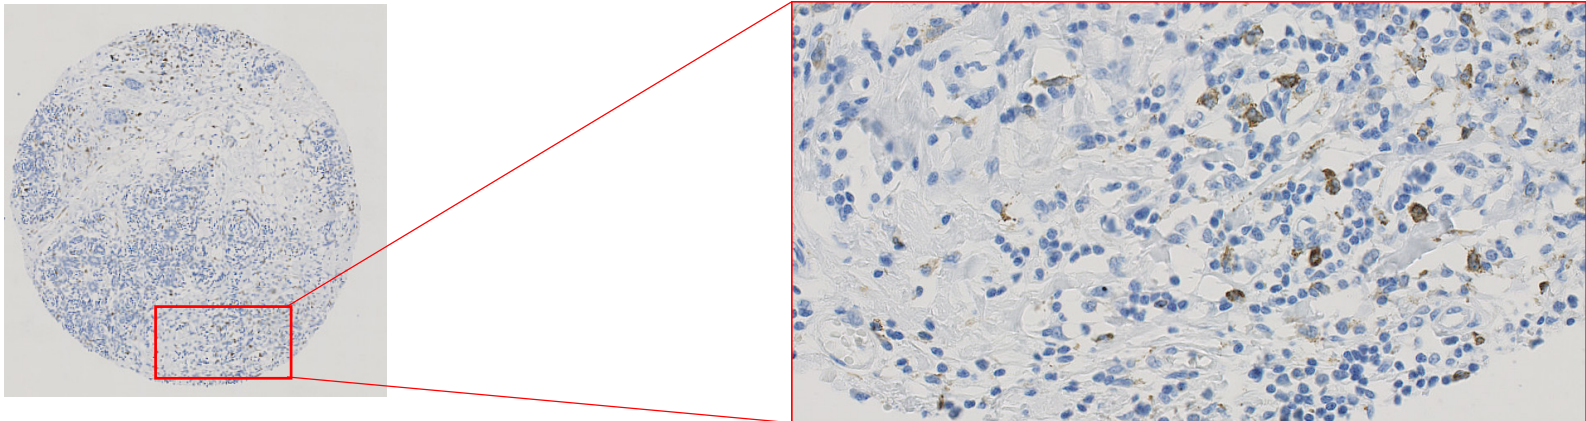

D) IRF8

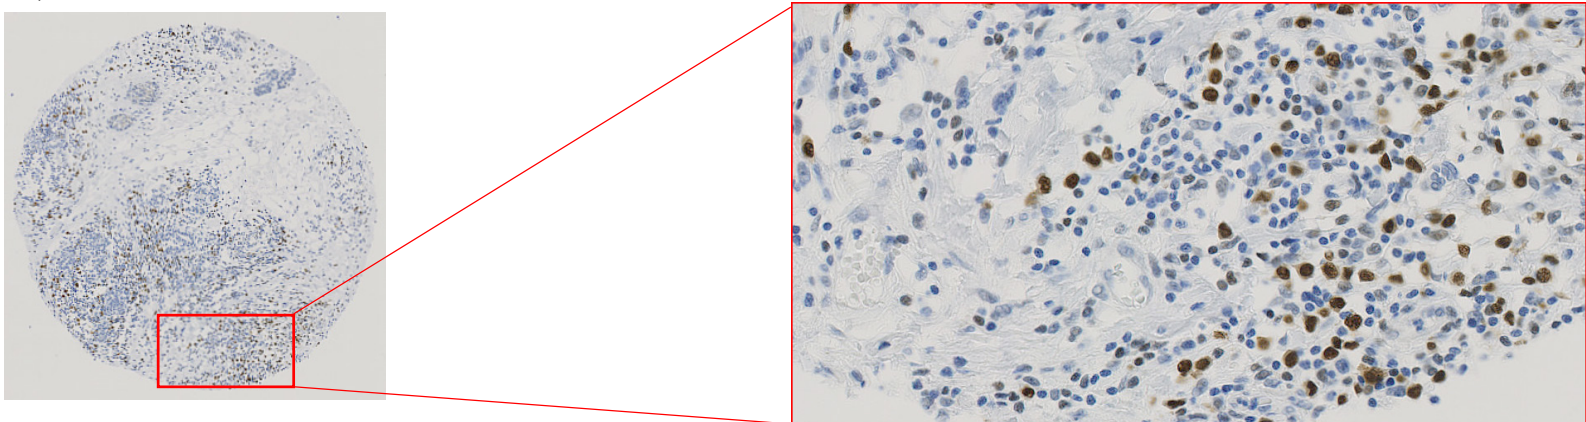

**Supplementary figure S2: Examples of CD68 (A), CD163 (B), CD206 (C) and IRF8 (D) immunostaining in serial sections of a single tumor from patient 2, with x 40 magnification of a selected area (right side images).**
