# Supplementary material for: Association of CD206 Protein Expression with Immune Infiltration and Prognosis in Patients with Triple-Negative Breast Cancer
Source: MDPI journal article supplement (doi:10.3390/cancers14194829), 2022-10-03

CD206 prognostic significance in T1 tumors

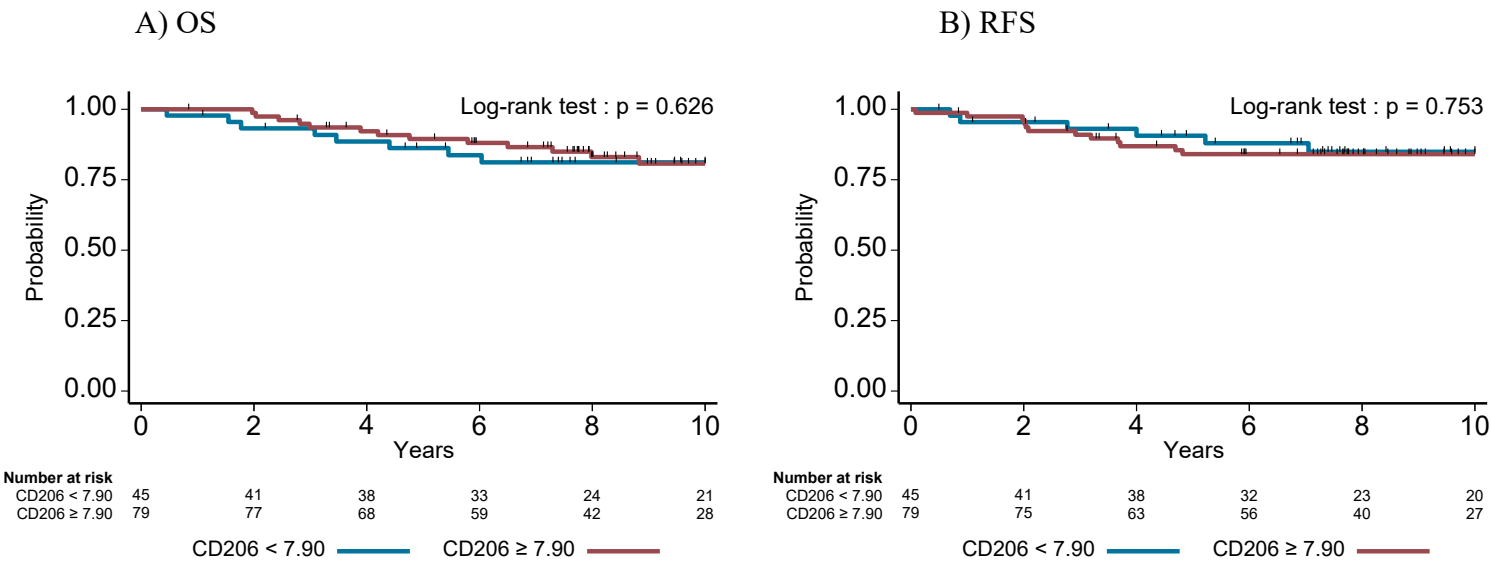

**Supplementary figure S5: Impact of CD206 expression on overall survival (OS) (A and C) and relapse free survival (RFS) (B and D) according to tumor size T1 (A and B) and tumor size ≥ T2 (C and D) expression levels.** Red lines represent high CD206 expression ( $\geq 7.90$  cells/cm<sup>2</sup>) and blue lines represent low CD206 expression (< 7.90 cells/mm<sup>2</sup>). N=124 samples for T1 tumors ; N=148 samples for tumors  $\geq$  T2.

CD206 prognostic significance in  $\geq$  T2 tumors

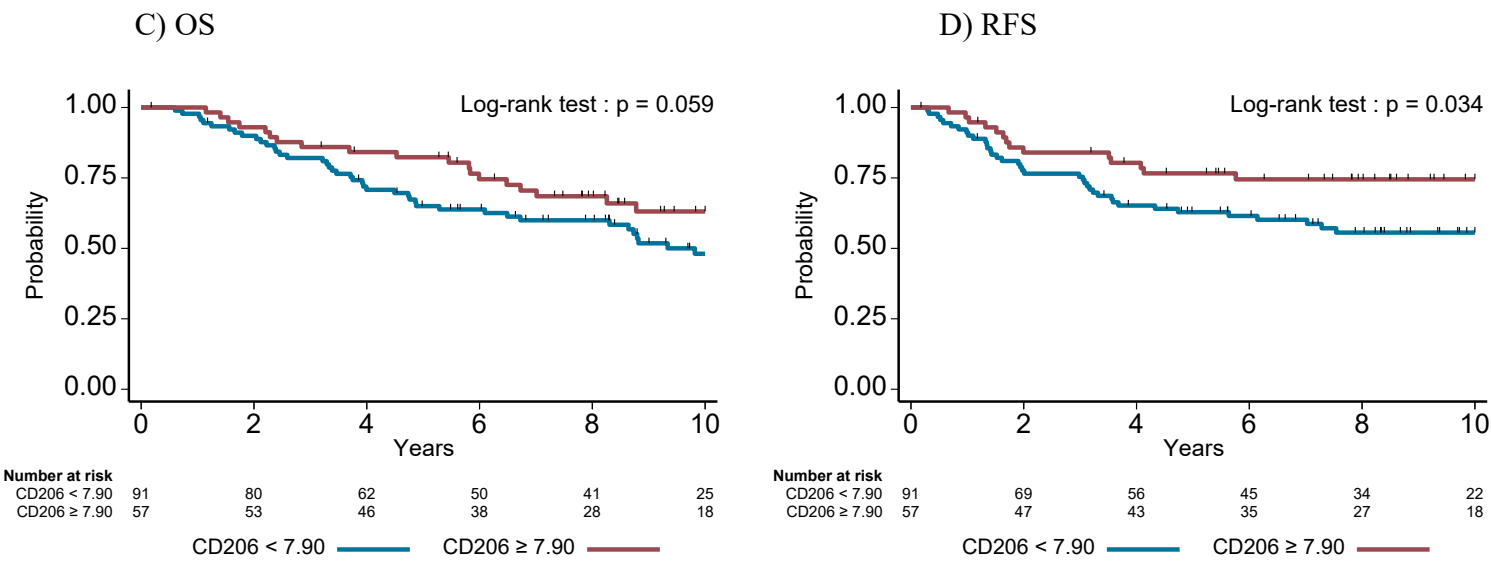

Supplement: s1 [file s1]
