# Supplementary material for: Association of CD206 Protein Expression with Immune Infiltration and Prognosis in Patients with Triple-Negative Breast Cancer
Source: MDPI journal article supplement (doi:10.3390/cancers14194829), 2022-10-03

CD206 prognostic significance in tumors with TILs ≤ 5%

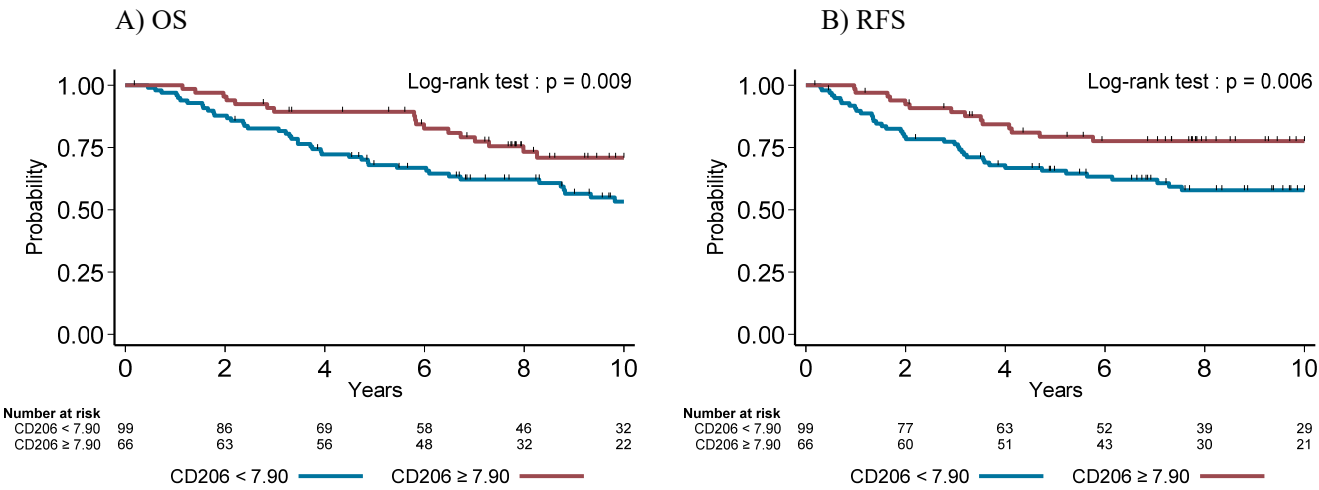

**Supplementary Figure S6: Influence of CD206 expression on overall survival (OS) (A and C) and relapse-free survival (RFS) (B and D) according to TILs level: TILs ≤ 5% (A and B) and TILs > 5% (C and D). Red lines represent high CD206 expression (≥ 7.90 cells/cm<sup>2</sup>) and blue lines represent low CD206 expression (< 7.90 cells/mm<sup>2</sup>). N=165 tumors with TILs ≤ 5%; N=102 tumors with TILs > 5%.**

CD206 prognostic significance in tumors with TILs > 5%

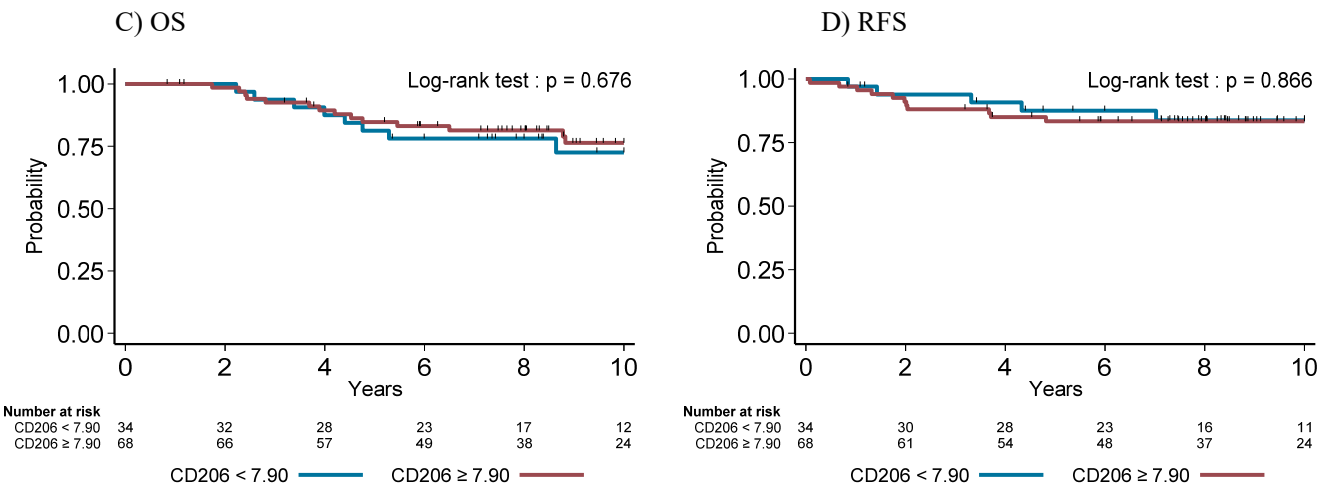

Supplement: s1 [file s1]
