# Supplementary material for: Association of CD206 Protein Expression with Immune Infiltration and Prognosis in Patients with Triple-Negative Breast Cancer
Source: MDPI journal article supplement (doi:10.3390/cancers14194829), 2022-10-03
Supplement: s1 [file s1]

| Macrophage marker                                 | Number of patients<br>(N = 285) | %            |
|---------------------------------------------------|---------------------------------|--------------|
| <b>CD68</b> (18 missing values)                   |                                 |              |
| Low (Score 0 to 2)                                | 173                             | 64.79        |
| High (Score > 2)                                  | 94                              | 35.21        |
| <b>CD163</b> (9 missing values)                   |                                 |              |
| Low (Score 0 to 2)                                | 200                             | 72.46        |
| High (Score > 2)                                  | 76                              | 27.54        |
| <b>CD206</b> median [min-max] (13 missing values) | 7.90                            | [0 – 441.19] |
| Low (< 7.90 cells/mm <sup>2</sup> )               | 136                             | 50.00        |
| High ( $\geq$ 7.90 cells/mm <sup>2</sup> )        | 136                             | 50.00        |
| <b>IRF8</b> median [min-max] (8 missing values)   | 3.11                            | [0 – 387.06] |
| Low (< 3.11 cells/mm <sup>2</sup> )               | 139                             | 50.18        |
| High ( $\geq$ 3.11 cells/mm <sup>2</sup> )        | 138                             | 49.82        |

**Supplementary Table S1:** TAM markers expression in TNBCs.

For each marker, low and high expression groups were defined. A semi-quantitative analysis of CD68 and CD163 expression was performed (scores 0 to 3) and the mean of duplicates was calculated for each patient. Low expression corresponds to scores 0 to 2, and high expression to scores >2. The total number of CD206- and IRF8-expressing TAMs was counted, and their densities reported as the number of positive cells per mm<sup>2</sup>. The mean of duplicates was calculated for each patient, and the median density in the population was used to classify samples in low and high expression.

|       |      | CD68 |       |      |       |                 | IRF8 |       |      |       |                 | CD163 |       |      |       |                 | CD206 |       |      |       |                 |
|-------|------|------|-------|------|-------|-----------------|------|-------|------|-------|-----------------|-------|-------|------|-------|-----------------|-------|-------|------|-------|-----------------|
|       |      | Low  |       | High |       | <i>p</i> -value | Low  |       | High |       | <i>p</i> -value | Low   |       | High |       | <i>p</i> -value | Low   |       | High |       | <i>p</i> -value |
|       |      | N    | %     | N    | %     |                 | N    | %     | N    | %     |                 | N     | %     | N    | %     |                 | N     | %     | N    | %     |                 |
| CD68  |      |      |       |      |       |                 |      |       |      |       |                 |       |       |      |       |                 |       |       |      |       |                 |
|       | Low  |      |       |      |       |                 | 107  | 81.68 | 61   | 46.92 | <0.001          | 156   | 81.25 | 15   | 20.55 | <0.001          | 96    | 71.64 | 73   | 57.03 | 0.013           |
|       | High |      |       |      |       |                 | 24   | 18.32 | 69   | 53.08 |                 | 36    | 18.75 | 58   | 79.45 |                 | 38    | 28.36 | 55   | 42.97 |                 |
| IRF8  |      |      |       |      |       |                 |      |       |      |       |                 |       |       |      |       |                 |       |       |      |       |                 |
|       | Low  | 107  | 63.69 | 24   | 25.81 | <0.001          |      |       |      |       |                 | 119   | 60.71 | 17   | 22.67 | <0.001          | 119   | 60.71 | 17   | 22.67 | <0.001          |
|       | High | 61   | 36.31 | 69   | 74.19 |                 |      |       |      |       |                 | 77    | 39.29 | 58   | 77.33 |                 | 77    | 39.29 | 58   | 77.33 |                 |
| CD163 |      |      |       |      |       |                 |      |       |      |       |                 |       |       |      |       |                 |       |       |      |       |                 |
|       | Low  | 156  | 91.23 | 36   | 38.30 | <0.001          | 119  | 87.50 | 77   | 57.04 | <0.001          |       |       |      |       |                 | 106   | 77.94 | 87   | 65.91 | 0.028           |
|       | High | 15   | 8.77  | 58   | 61.70 |                 | 17   | 12.50 | 58   | 42.96 |                 |       |       |      |       |                 | 30    | 22.06 | 45   | 34.09 |                 |
| CD206 |      |      |       |      |       |                 |      |       |      |       |                 |       |       |      |       |                 |       |       |      |       |                 |
|       | Low  | 96   | 56.80 | 38   | 40.86 | 0.013           | 91   | 69.47 | 43   | 32.09 | <0.001          | 106   | 54.92 | 30   | 40.00 | 0.028           |       |       |      |       |                 |
|       | High | 73   | 43.20 | 55   | 59.14 |                 | 40   | 30.53 | 91   | 67.91 |                 | 87    | 45.08 | 45   | 60.00 |                 |       |       |      |       |                 |

**Supplementary Table S2:** Correlation of CD68, IRF8, CD163 and CD206 expression levels.
