# Supplementary material for: Association of CD206 Protein Expression with Immune Infiltration and Prognosis in Patients with Triple-Negative Breast Cancer
Source: Cancers (Basel). 2022 Oct 3;14(19):4829. doi: 10.3390/cancers14194829 (PMC9564167; doi:10.3390/cancers14194829)
Supplement: Supplementary file 1 [file cancers-14-04829-s001.zip]

Archive with 7 entries (7 files):
- cancers-1843554-supplementary Figure S6.pdf
- Manuscript MacrophagesTNBC-Bobrie-SuppFigureS1.pdf
- Manuscript MacrophagesTNBC-Bobrie-SuppFigureS2.pdf
- Manuscript MacrophagesTNBC-Bobrie-SuppFigureS3.pdf
- Manuscript MacrophagesTNBC-Bobrie-SuppFigureS4.pdf
- Manuscript MacrophagesTNBC-Bobrie-SuppFigureS5.pdf
- Manuscript MacrophagesTNBC-Bobrie-Supplementary tables.pdf
